# Supplementary material
Source: PubMed Central journal article supplement (PMC4247571)
Supplement: supp_tpc.114.129379_tpc129379_Supplemental.pdf [file supp_tpc.114.129379_tpc129379_Supplemental.pdf]

Figure S1

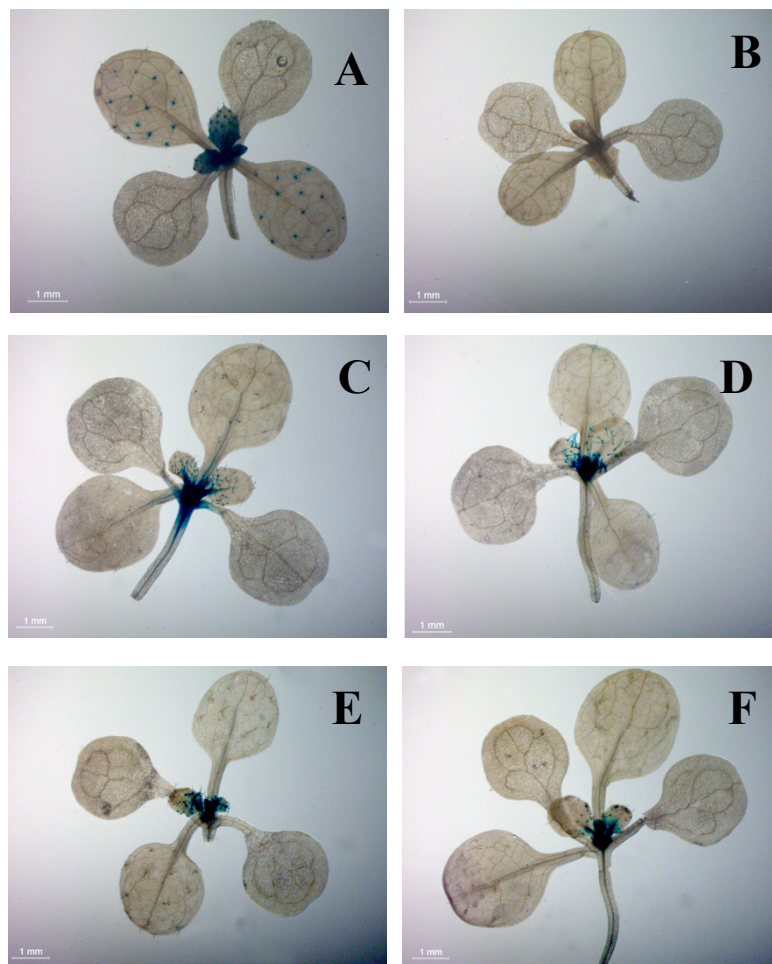

**Figure S1:** *TRY* but not *GL2* or *CPC* expression depends on *TTG2*

Expression pattern of the 5' regulatory regions of the *GL2*, *CPC* and *TRY* promoter in Ler and *ttg2* background as revealed by GUS reporter gene expression. Whole rosettes are shown. pTRY:GUS Ler (A), pTRY:GUS *ttg2* (B), pCPC:GUS Ler (C), pCPC:GUS *ttg2* (D), pGL2:GUS Ler (E), pGL2:GUS *ttg2* (F). Bars indicate the magnification of the images.

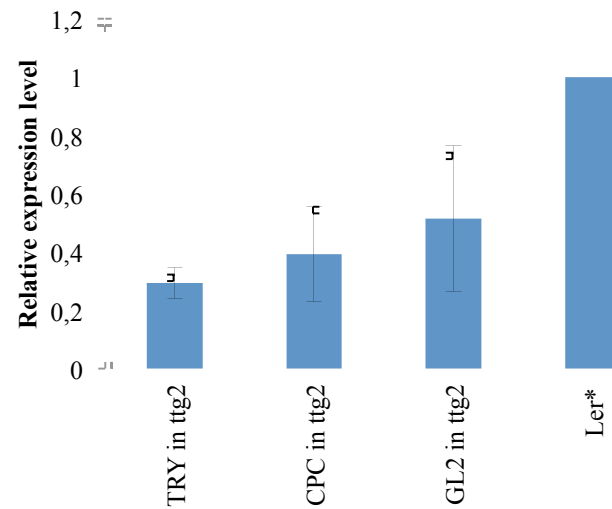

**Figure S2:** Analysis of TRY, CPC and GL2 expression by Real Time PCR.

*TRY*, *CPC* and *GL2* expression in 10-day-old leaves three and four in *ttg2* mutants were analyzed by quantitative real-time PCR. \*The expression levels were normalized to that of the respective genes in *Ler*. The *18s-RNA* was used as an endogenous control. Error bars indicate the standard deviation of two biological replicas including three technical replicas. The expression of *TRY*, *CPC* and *GL2* were significantly reduced compared to wild type (Student's T-test,  $p < 0,01$ ).

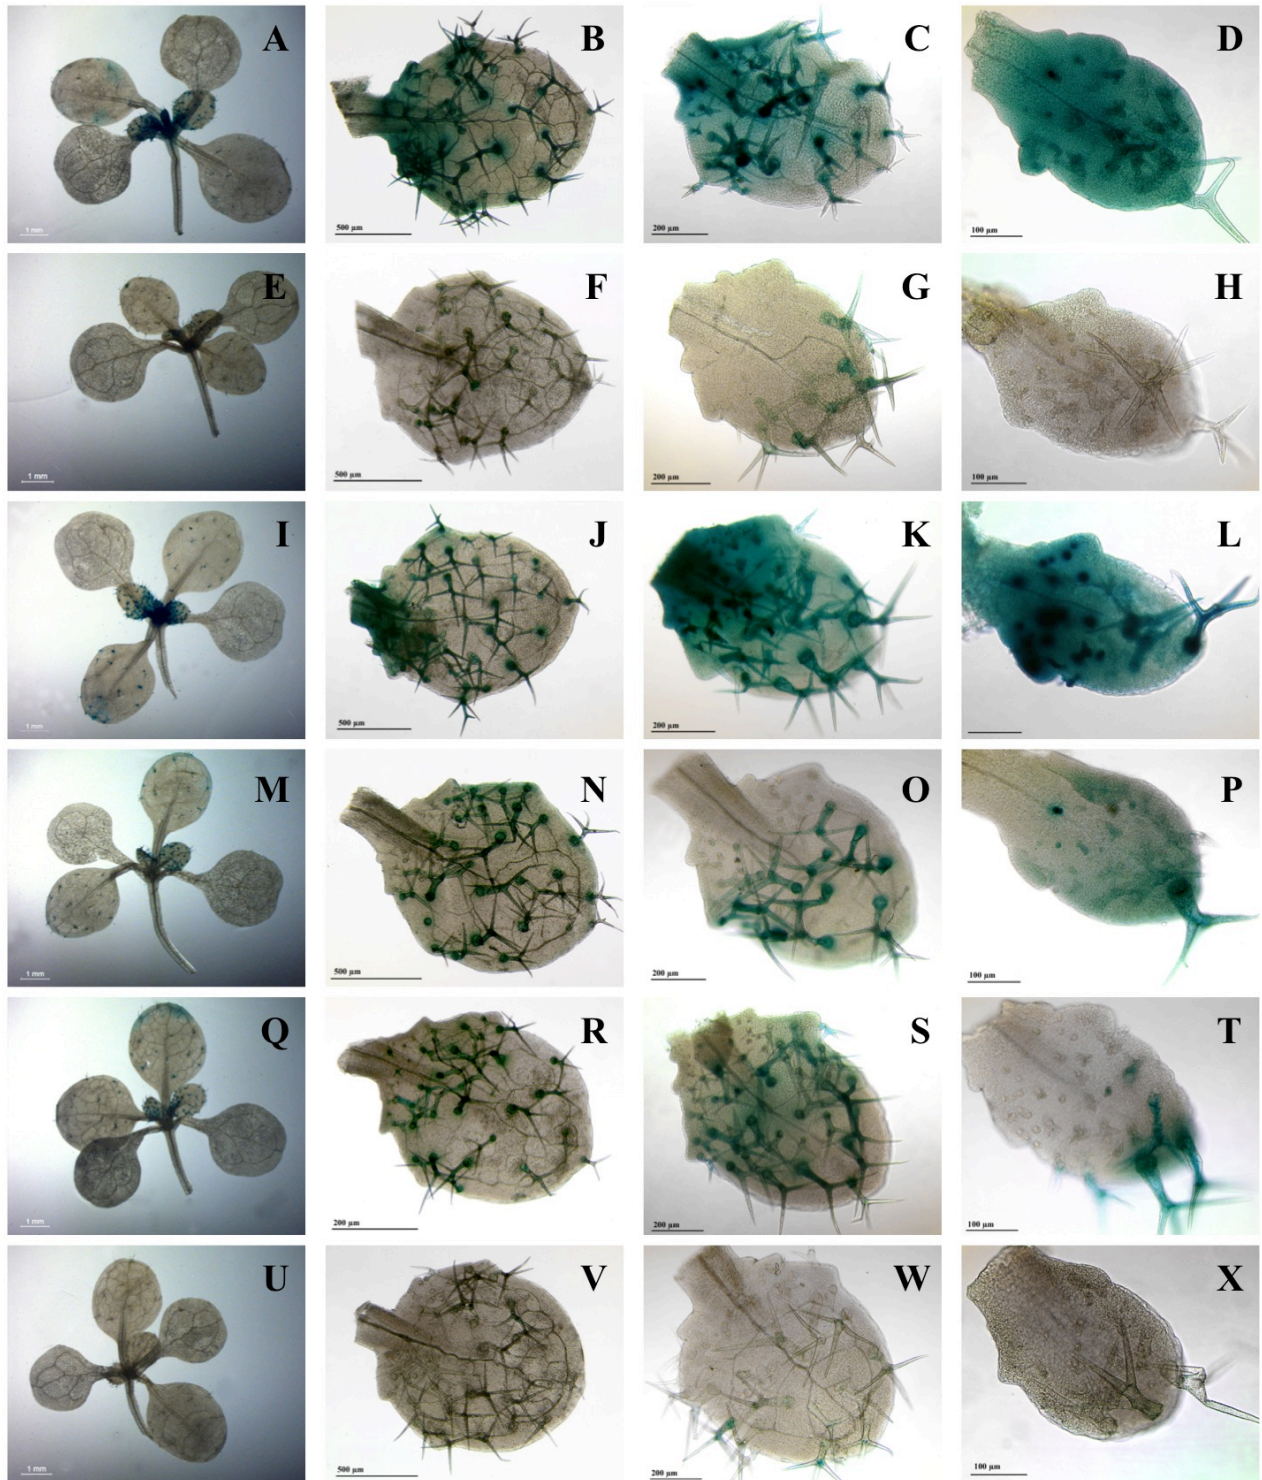

**Figure S3:** Expression analysis of *TRY* promoter fragments carrying mutations in W-boxes.

The expression pattern is shown for 10 days old plants: the whole rosette, and leaf number three to five to document different leaf developmental stages with leaf number three representing a mature leaf, leaf number four for an intermediate developmental stage and leaf number five to show a young leaf. A-D) pTRY-A3,B:GUS, E-H); pTRY-A3,B ( $\Delta$ 234-176):GUS; I-L) pTRY-A3,B:GUS; M-P) pTRY-A3,B(mW1):GUS. The examples show leaves lacking the TRY expression at the leaf base. Q-T) pTRY-A3,B(mW2):GUS. These examples show trichome specific expression but no epidermal expression at all stages. U-X) pTRY-A3,B(mW1mW2):GUS.

## Figure S4

|        |                                                                 |
|--------|-----------------------------------------------------------------|
| W1W2   | GAGT <b>GTCAAC</b> GACAAGTCTACACAAAGGGTAAGAG <b>GTCAAC</b> CAAG |
| mW1mW2 | GAGTCCCGGCGACAAGTCTACACAAAGGGTAAGAGCCCGGCAAG                    |
| mW1W2  | GAGTCCCGGCGACAAGTCTACACAAAGGGTAAGAG <b>GTCAAC</b> CAAG          |
| W1mW2  | GAGT <b>GTCAAC</b> GACAAGTCTACACAAAGGGTAAGAGCCCGGCAAG           |
| W1     | TTTGAGT <b>GTCAAC</b> GACAAG                                    |
| mW1    | TTTGAGTCCCGGCGACAAG                                             |
| W2     | GTAAGAG <b>GTCAAC</b> CAAGACC                                   |
| mW2    | GTAAGAGCCCGGCAAGACC                                             |
| 1XW2*  | TTATTCAGCCATCAAAAAG <b>TTGACCA</b> ATAAT                        |
| m19**  | TTATTCAGCCATCAAAAAG <b>TAGACCA</b> ATAAT                        |

**Figure S4:** Sequences of wild type and mutated W-boxes of the *TRY* promoter.

The region of the *TRY* promoter containing the wild-type and mutated sequences of the two W-boxes are shown. The W-Boxes are shown in red and the mutated W-boxes in a lighter grey. \* The sequence 1xW2 was published previously and is identical to the region of the parsley *PR1-1* promoter that contains the W-Box W2 (Ciolkowski et al., 2008). \*\* m19 is a base substitution variant of 1xW2 that abolishes binding specificity (Ciolkowski et al., 2008).

## Figure S5

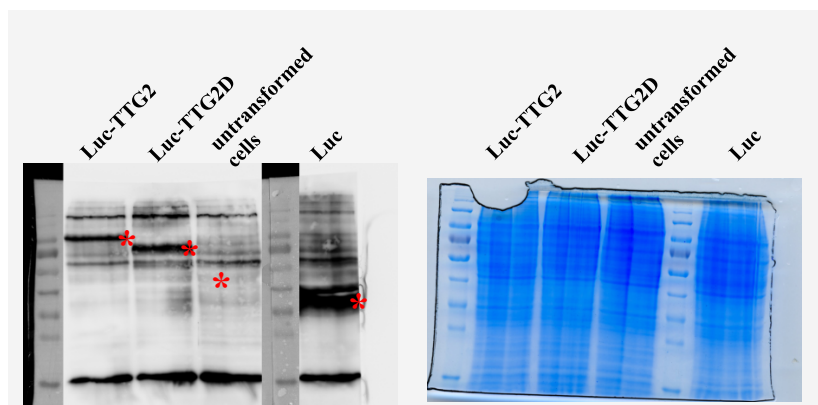

**Figure S5:** Integrity and functionality of Luc-TTG2 and Luc-TTG2D fusion proteins. Western blot (left) and the corresponding Coomassie gel (right) showing the protein extract of HEC cells expressing Luc-TTG2 and Luc-TTG2D proteins. The luciferase antibody detects the two proteins at the expected size indicating that the presence of full-length fusion proteins. Asterisk (\*) indicates the respective expressed protein band.

Figure S6

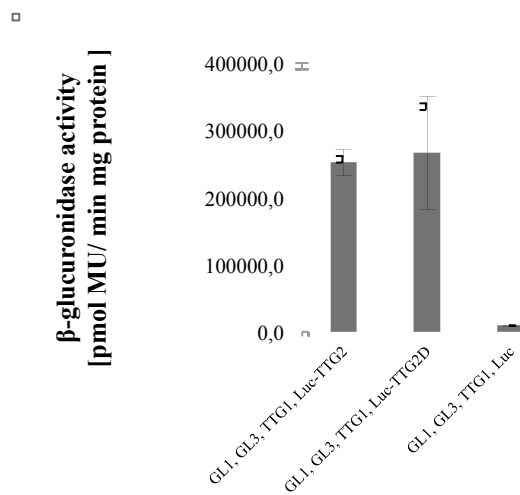

**Figure S6:** Expression levels of promoter:GUS constructs

Arabidopsis cell suspension cultures were transformed with the pTRY:GUS construct along with 35S:cDNAs of GL1, GL3, TTG1 and TTG2. The relative expression levels of the promoter:GUS constructs were determined by b-gluconidase assays in three independent experiments. Error bars indicate the standard deviation.

Figure S7

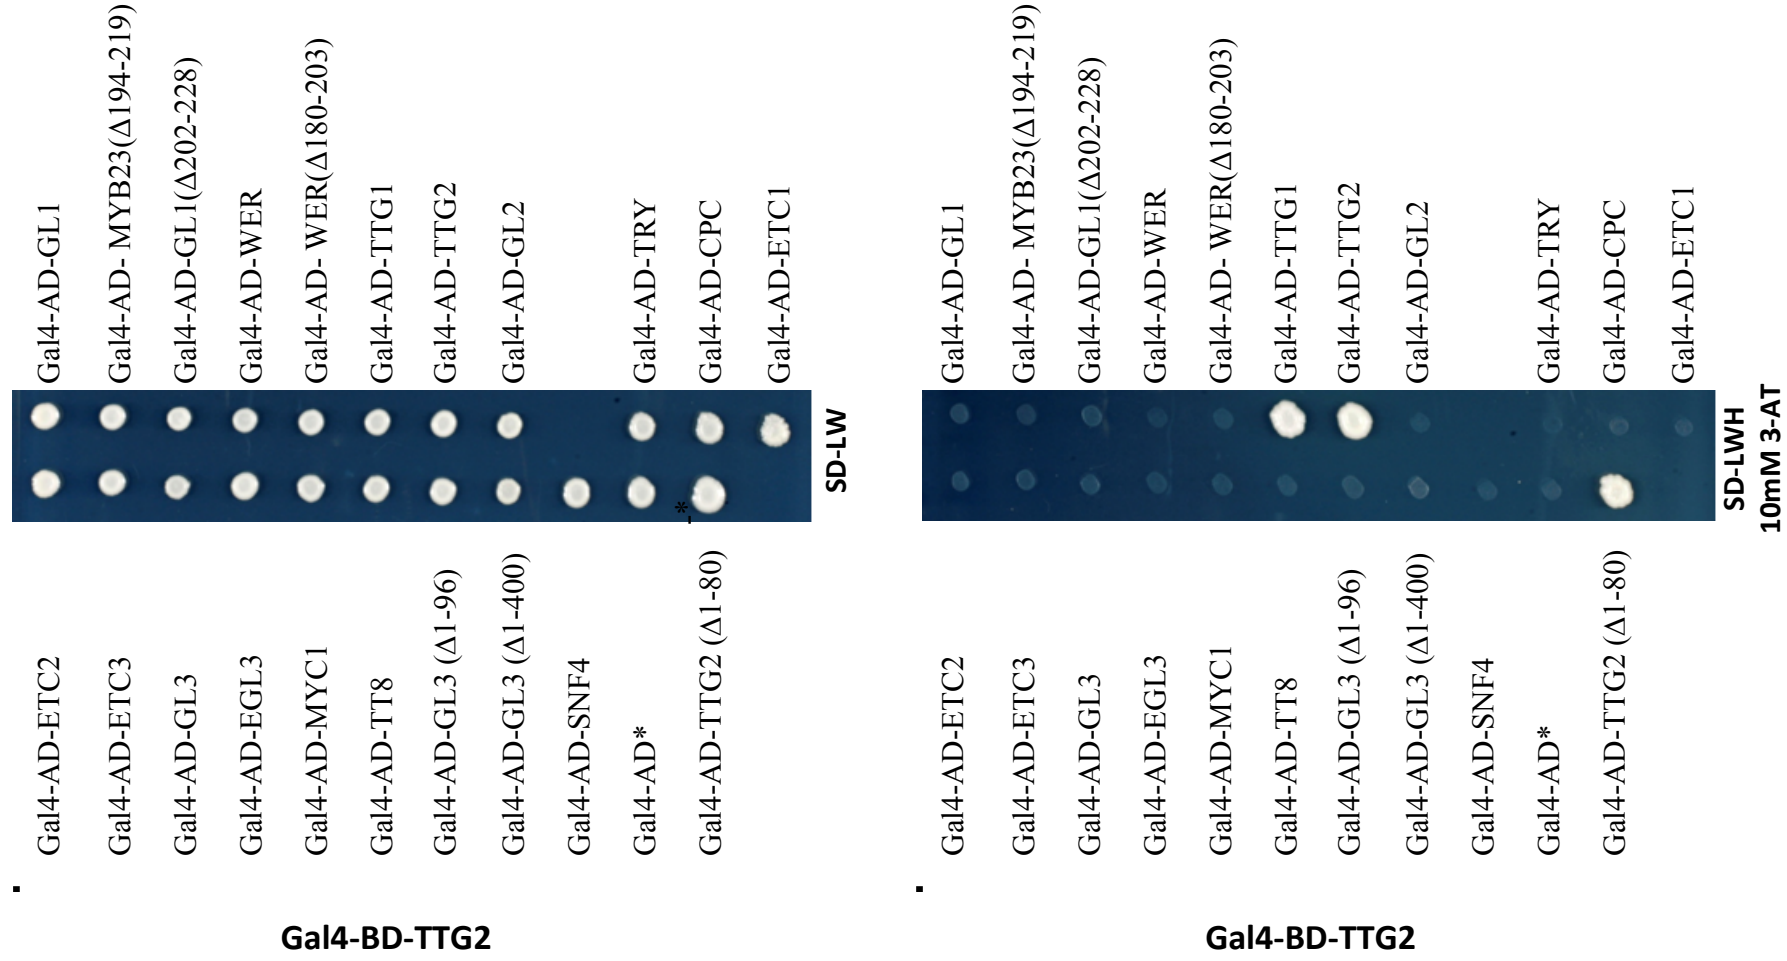



**Figure S7:** Yeast two hybrid interactions of TTG2-BD with other trichome patterning proteins. Interaction of TTG2 fused to the DNA binding domain with other trichome and root hair patterning proteins as indicated. Asterisk (\*) indicates control construct without CDS fusion.

Figure S8

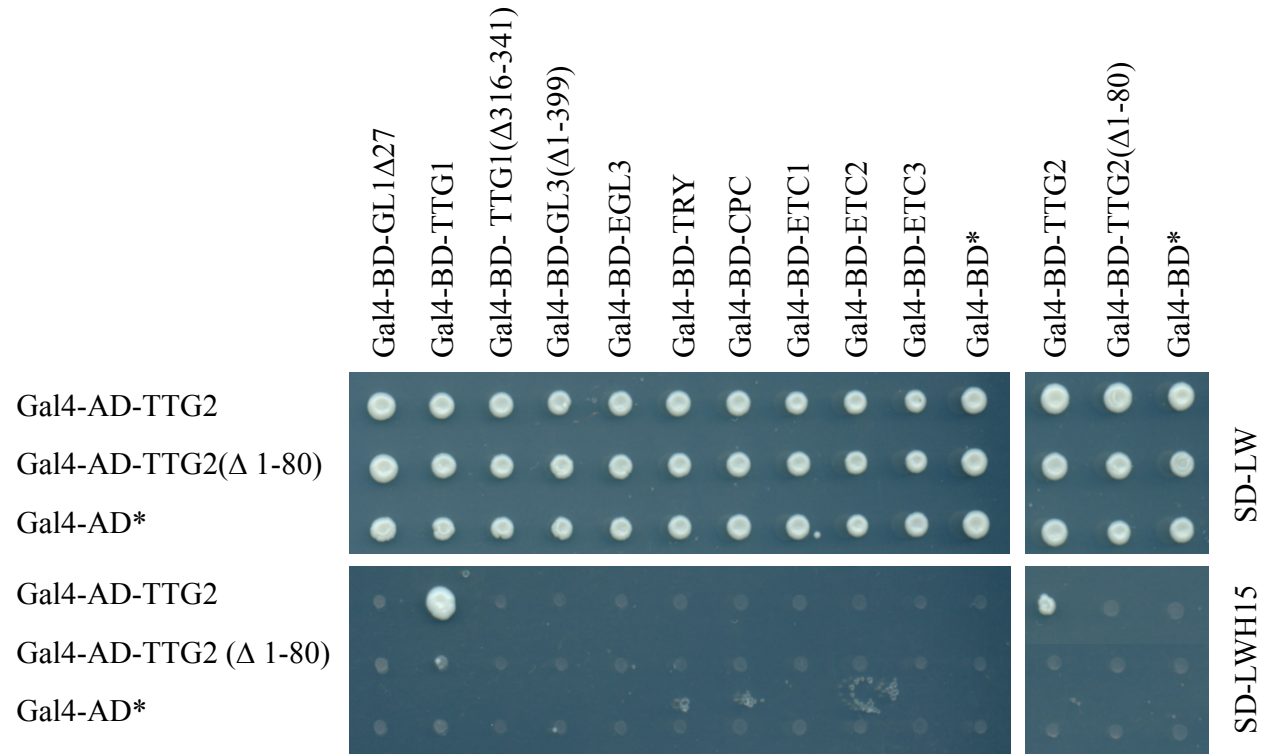

**Figure S8:** Yeast two hybrid interactions of TTG2-AD with other trichome patterning proteins. Interaction of TTG2 fused to the activation domain with other trichome and root hair patterning proteins as indicated.

Figure S9

|                                | template        | fragment No.                  | Primer Code | Primer Name                       |                                                                    |
|--------------------------------|-----------------|-------------------------------|-------------|-----------------------------------|--------------------------------------------------------------------|
| pTRY-A3(Δ234-176)              | Pr15            | <b>Pr181</b>                  | 19          | TRY-F3-sen-attB1                  | GGGGACAAGTTTGTACAAAAAGCAGGCTGTGAAACTAATTGTTACTATATGG               |
|                                |                 |                               | 81          | TRY-F4-asen-attB2 (ohne WRKYs)    | GGGGACCACCTTTGTACAAGAAAGCTGGGTCTCAAATACACATGGAGATG                 |
| pTRY-A3(Δ195-176)              | Pr15            | <b>Pr182</b>                  | 19          | TRY-F3-sen-attB1                  | GGGGACAAGTTTGTACAAAAAGCAGGCTGTGAAACTAATTGTTACTATATGG               |
|                                |                 |                               | 92          | Try-Linker69-PCR-rev (mit W-Box2) | GGGGACCACCTTTGTACAAGAAAGCTGGGTGTGGACCTCTTACCC                      |
| pTRY-A3-fragment I (mW1)       | Pr15            | <b>Pr154</b>                  | 19          | TRY-F3-sen-attB1                  | GGGGACAAGTTTGTACAAAAAGCAGGCTGTGAAACTAATTGTTACTATATGG               |
|                                |                 |                               | 161         | MP-Pr23-mutW-BOX1-Fr1-rev         | CCCTTTGTGTAGACTTGTGCGCCGGGACTCAAATAC                               |
| pTRY-A3-fragment II (mW1)      | Pr15            | <b>Pr155</b>                  | 162         | MP-Pr23-mutW-BOX1-Fr2-for         | GTATTTGAGTCCCGGCGACAAGTCTACACAAAGGG                                |
|                                |                 |                               | 20          | TRY-F3-asen-attB2                 | GGGGACCACCTTTGTACAAGAAAGCTGGGTAAAGAAGTGTGTGGTCT                    |
| pTRY-A3 (mW1)                  | Pr154+Pr155     | <b>Pr168</b>                  | 19          | TRY-F3-sen-attB1                  | GGGGACAAGTTTGTACAAAAAGCAGGCTGTGAAACTAATTGTTACTATATGG               |
|                                |                 |                               | 20          | TRY-F3-asen-attB2                 | GGGGACCACCTTTGTACAAGAAAGCTGGGTAAAGAAGTGTGTGGTCT                    |
| pTRY-A3-fragment I (mW2)       | Pr15            | <b>Pr156</b>                  | 19          | TRY-F3-sen-attB1                  | GGGGACAAGTTTGTACAAAAAGCAGGCTGTGAAACTAATTGTTACTATATGG               |
|                                |                 |                               | 163         | MP-Pr23-mutW-BOX2-Fr1-rev         | GGTCTTCCGGGCTCTTACCCTTGTGTAGACTTG                                  |
| pTRY-A3-fragment II (mW2)      | Pr15            | <b>Pr157</b>                  | 164         | MP-Pr23-mutW-BOX2-Fr2-for         | CAAGTCTACAAAAGGGTAAGAGCCCGCAAGACC                                  |
|                                |                 |                               | 20          | TRY-F3-asen-attB2                 | GGGGACCACCTTTGTACAAGAAAGCTGGGTAAAGAAGTGTGTGGTCT                    |
| pTRY-A3 (mW2)                  | Pr156+Pr157     | <b>Pr169</b>                  | 19          | TRY-F3-sen-attB1                  | GGGGACAAGTTTGTACAAAAAGCAGGCTGTGAAACTAATTGTTACTATATGG               |
|                                |                 |                               | 20          | TRY-F3-asen-attB2                 | GGGGACCACCTTTGTACAAGAAAGCTGGGTAAAGAAGTGTGTGGTCT                    |
| pTRY-A3-fragment I (mW1mW2)    | Pr168           | <b>Pr186</b>                  | 19          | TRY-F3-sen-attB1                  | GGGGACAAGTTTGTACAAAAAGCAGGCTGTGAAACTAATTGTTACTATATGG               |
|                                |                 |                               | 163         | MP-Pr23-mutW-BOX2-Fr1-rev         | MP-Pr23-mutW-BOX2-Fr1-rev                                          |
| pTRY-A3-fragment II (mW1mW2)   | Pr168           | <b>Pr187</b>                  | 164         | MP-Pr23-mutW-BOX2-Fr2-for         | MP-Pr23-mutW-BOX2-Fr2-for                                          |
|                                |                 |                               | 20          | TRY-F3-asen-attB2                 | GGGGACCACCTTTGTACAAGAAAGCTGGGTAAAGAAGTGTGTGGTCT                    |
| pTRY-A3 (mW1mW2)               | Pr186+Pr187     | <b>Pr192</b>                  | 19          | TRY-F3-sen-attB1                  | GGGGACAAGTTTGTACAAAAAGCAGGCTGTGAAACTAATTGTTACTATATGG               |
|                                |                 |                               | 20          | TRY-F3-asen-attB2                 | GGGGACCACCTTTGTACAAGAAAGCTGGGTAAAGAAGTGTGTGGTCT                    |
| pTRY-A3-B-fragment I (mW1mW2)  | R260            | <b>Pr205</b>                  | 19          | TRY-F3-sen-attB1                  | GGGGACAAGTTTGTACAAAAAGCAGGCTGTGAAACTAATTGTTACTATATGG               |
|                                |                 |                               | -           | Fusion15+33-rev                   | GCAAAACTAATAGTAAGAAGTGTGTGG                                        |
| pTRY-A3-B-fragment II (mW1mW2) | R260            | <b>Pr206</b>                  | -           | Fusion15+33-for                   | CCACACAACACTTCTACTATTAGTTTTGC                                      |
|                                |                 |                               | 179         | 5'-TRY-179-rev-attB2              | GGGGACCACCTTTGTACAAGAAAGCTGGGTCAAAGCTTTATTGAAGTAAGAAAAGAAAATAGAGAG |
| pTRY-A3-B (mW1mW2)             | R260a + R260b   | <b>Pr207 = Pr195 (mW1mW2)</b> | 19          | TRY-F3-sen-attB1                  | GGGGACAAGTTTGTACAAAAAGCAGGCTGTGAAACTAATTGTTACTATATGG               |
|                                |                 |                               | 179         | 5'-TRY-179-rev-attB2              | GGGGACCACCTTTGTACAAGAAAGCTGGGTCAAAGCTTTATTGAAGTAAGAAAAGAAAATAGAGAG |
| pTRY-A3-B                      | genomic DNA Ler | <b>Pr195</b>                  | 19          | TRY-F3-sen-attB1                  | GGGGACAAGTTTGTACAAAAAGCAGGCTGTGAAACTAATTGTTACTATATGG               |
|                                |                 |                               | 179         | 5'-TRY-179-rev-attB2              | GGGGACCACCTTTGTACAAGAAAGCTGGGTCAAAGCTTTATTGAAGTAAGAAAAGAAAATAGAGAG |

MP-WRKY-for-EcoRI **catctccatgtGAATTCgagt**  
 MP-WRKY-for-KpnI **catctccatgtGGTACCgagt**  
 MP-WRKY-for-BamHI **catctccatgtGGATCCgagt**  
 MP-WRKYrev-KpnI **eGGTACCAACTAATAGTAAGAAGTGTTG**  
 MP-WRKYrev-BamHI **eGGATCCAACTAATAGTAAGAAGTGTTG**  
 MP-WRKYrev-XbaI **cTCTGAGAACTAATAGTAAGAAGTGTTG**

W1W2 **GAGTGTCAACGACAAGTCTACAAAAAGGGTAAGAGGTCAACAAG**  
 mW1mW2 **GAGTCCC GGCGACAAGTCTACAAAAAGGGTAAGAGCCCGGCAAG**  
 mW1W2 **GAGTCCC GGCGACAAGTCTACAAAAAGGGTAAGAGGTCAACAAG**  
 W1mW2 **GAGTGTCAACGACAAGTCTACAAAAAGGGTAAGAGCCCGGCAAG**  
 W1 **TTTGAGTGTCAACGACAAG**  
 mW1 **TTTGAGTCCC GGCGACAAG**  
 W2 **GTAAGAGGTCAACAAGACC**  
 mW2 **GTAAGAGCCCGGCAAGACC**

MP-TTG2-WRKY-Domänen-for **GGGGACAAGTTTGTACAAAAAGCAGGCTTAACTGGGGATAGATCTTCT**  
 MP-TTG2-WRKY-Domänen-rev **GGGGACCACCTTTGTACAAGAAAGCTGGGTACTAGAGCAAATGATGATTATG**

MP-Ascl-Renilla-rev **TTGGCGCGCCATCCCCTGCTCTTCTC**  
 MP-Kpn-Renilla-for **TTGGTACCATGACCAGCAAGGTGTACGAC**

W18D-fwd **CTG GTT CCG CGG GTG CCT ACT GAA ACA TCG GAC AC**  
 W18D-rev **TCC TCC GGT ACC TCA TGT AGC ATC CCC TTC AGA AGC ATT**
